# Supplementary material for: Nanocomposite of Ellagic Acid with Multi-Walled Carbon Nanotubes for the Simultaneous Voltammetric Detection of Six Biomolecules
Source: MDPI journal article supplement (doi:10.3390/c7020043), 2021-05-03
Supplement: s1 [file s1]

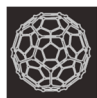

*Supplementary Information*  
*for*

**Nanocomposite of Ellagic Acid with Multi-Walled Carbon  
Nanotubes for the Simultaneous Voltammetric Detection of Six  
Biomolecules**

Najmeh Sabbaghi, Meissam Noroozifar, Kagan Kerman\*

Department of Physical and Environmental Sciences, University of Toronto Scarborough,  
1265 Military Trail, Toronto, Ontario, M1C 1A4, Canada

\*Correspondence: [kagan.kerman@utoronto.ca](mailto:kagan.kerman@utoronto.ca) (K.K)

**Table S1.** Analytical parameters for the simultaneous determination of AA, DA, UA, Trp, XN and CA using MGPE/MWCNTs-EA.

| Analytes | Linear range<br>( $\mu\text{M}$ ) | Calibration curve eqs.              | R <sup>2</sup> | LOD (nM) |
|----------|-----------------------------------|-------------------------------------|----------------|----------|
| AA       | 0.099-5.9                         | $I_p = 1.6249[\text{AA}] + 2.8868$  | 0.993          | 91       |
|          | 5.9-54                            | $I_p = 0.2905[\text{AA}] + 11.116$  | 0.993          |          |
| DA       | 0.099-5.9                         | $I_p = 2.5049[\text{DA}] + 3.0502$  | 0.991          | 9.9      |
|          | 5.9-54                            | $I_p = 0.2509[\text{DA}] + 14.676$  | 0.997          |          |
| UA       | 0.099-4.9                         | $I_p = 2.9013[\text{UA}] + 4.2148$  | 0.988          | 13       |
|          | 4.9-54                            | $I_p = 0.4777[\text{UA}] + 19.572$  | 0.993          |          |
| Trp      | 0.099-5.9                         | $I_p = 2.1961[\text{Trp}] + 4.6515$ | 0.981          | 11       |
|          | 5.9-54                            | $I_p = 0.2549[\text{Trp}] + 14.286$ | 0.997          |          |
| XN       | 0.099-7.9                         | $I_p = 3.0116[\text{XN}] + 5.1323$  | 0.988          | 14       |
|          | 7.9-54                            | $I_p = 0.7350[\text{XN}] + 22.263$  | 0.993          |          |
| CA       | 0.099-5.9                         | $I_p = 3.0140[\text{CF}] + 5.0675$  | 0.990          | 78       |
|          | 5.9-54                            | $I_p = 0.6289[\text{CF}] + 20.598$  | 0.982          |          |

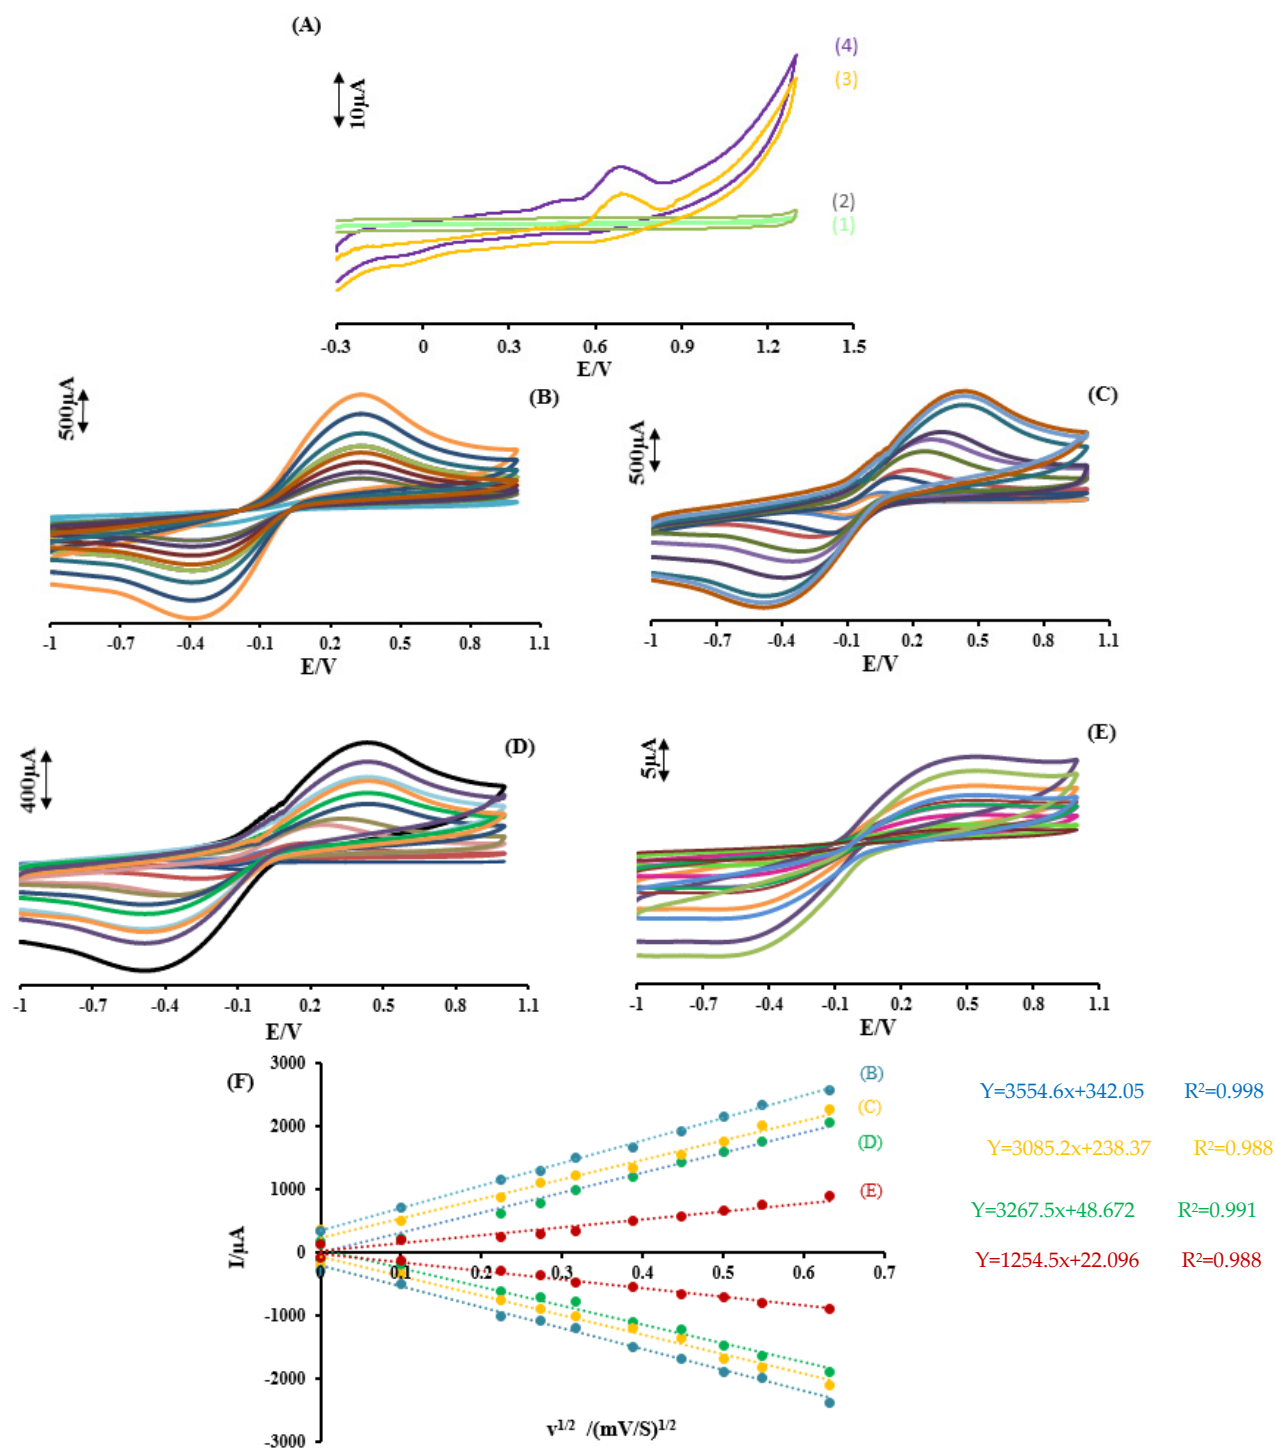

**Figure S1.** (A) Electrochemical studies of different electrodes in pH 2.0 PBS (1) GPE, (2) MGPE/MWCNTs, (3) MGPE/EA, and (4) MGPE/MWCNTs-EA. (B) MGPE/MWCNTs-EA, (C) MGPE/MWCNTs, (D) MGPE/EA and (E) GPE in 1 mM  $[\text{Fe}(\text{CN})_6]^{3-}$  prepared in 0.1 M KCl with different scan rate (F) the plot of peak current *vs.* the square root of scan rate for MGPE/MWCNTs-EA, MGPE/MWCNTs, MGPE/EA and GPE.

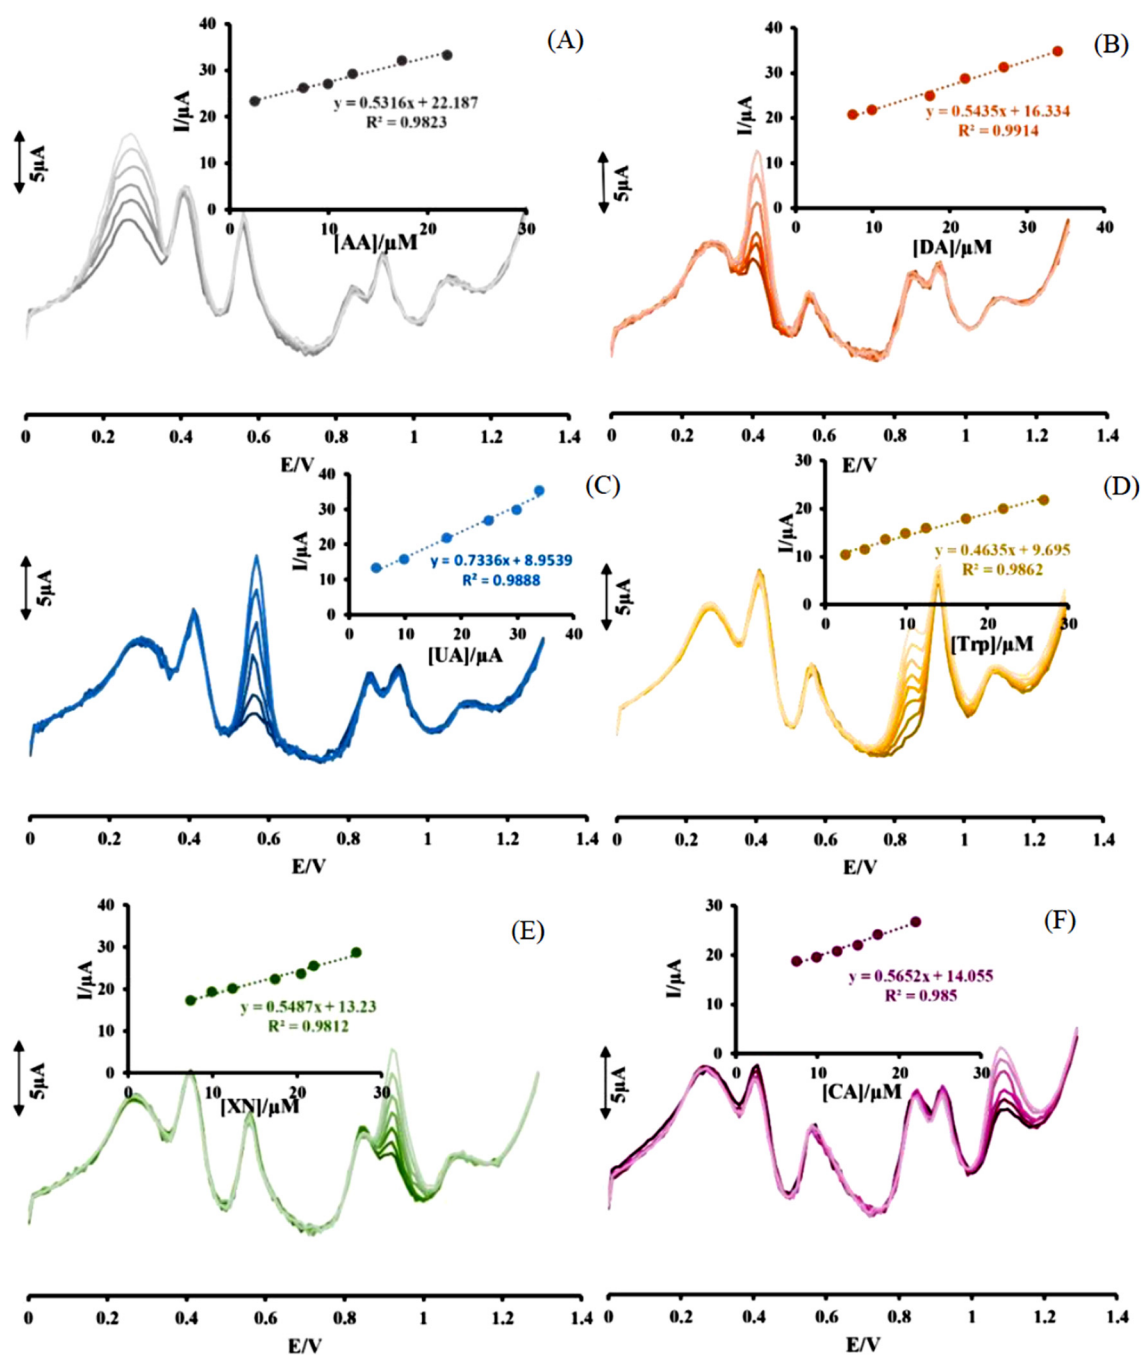

**Figure S2.** Differential pulse voltammograms at MGPE/MWCNTs-EA in 0.1 M PBS (pH 2.0) (A) containing DA (14.9  $\mu\text{M}$ ), UA (9.9  $\mu\text{M}$ ), Trp, XN and CA (4.9  $\mu\text{M}$ ) and different concentrations of AA (from inner to outer): (2.5, 7.4, 9.9, 12.4, 17.4 and 22.0  $\mu\text{M}$ ), (B) containing AA (2.5  $\mu\text{M}$ ), UA, Trp, XN and CA (4.9  $\mu\text{M}$  each) and different concentrations of DA (from inner to outer): (7.4, 9.9, 17.4, 22.0, 27.0 and 34  $\mu\text{M}$ ), (C) containing AA (2.5  $\mu\text{M}$ ), DA (14.9  $\mu\text{M}$ ), Trp, XN, CA (4.9  $\mu\text{M}$  each) and different concentrations of UA (from inner to outer): (4.9, 9.9, 17.4, 24.9, 29.9 and 34.0  $\mu\text{M}$ ), (D) containing AA (2.5  $\mu\text{M}$ ), DA (14.9  $\mu\text{M}$ ), UA, CA (4.9  $\mu\text{M}$  each) XN (9.9  $\mu\text{M}$ ) and different concentrations of Trp (from inner to outer): (2.5, 4.9, 7.4, 9.9, 12.4, 17.4, 22.0 and 27.0  $\mu\text{M}$ ), (E) containing AA (2.5  $\mu\text{M}$ ), DA (14.9  $\mu\text{M}$ ), UA, CA (4.9  $\mu\text{M}$  each), Trp (9.9  $\mu\text{M}$ ), and different concentrations of XN (from inner to outer): (7.4, 9.9, 12.4, 17.4, 20.5, 22.0 and 27.0  $\mu\text{M}$ ) and (F) containing AA (2.5  $\mu\text{M}$ ), DA, Trp (9.9  $\mu\text{M}$ ) UA, XN (4.9  $\mu\text{M}$  each) and different concentrations of CA (from inner to outer): (7.4, 9.9, 12.4, 14.9, 17.4 and 22.0  $\mu\text{M}$ ).

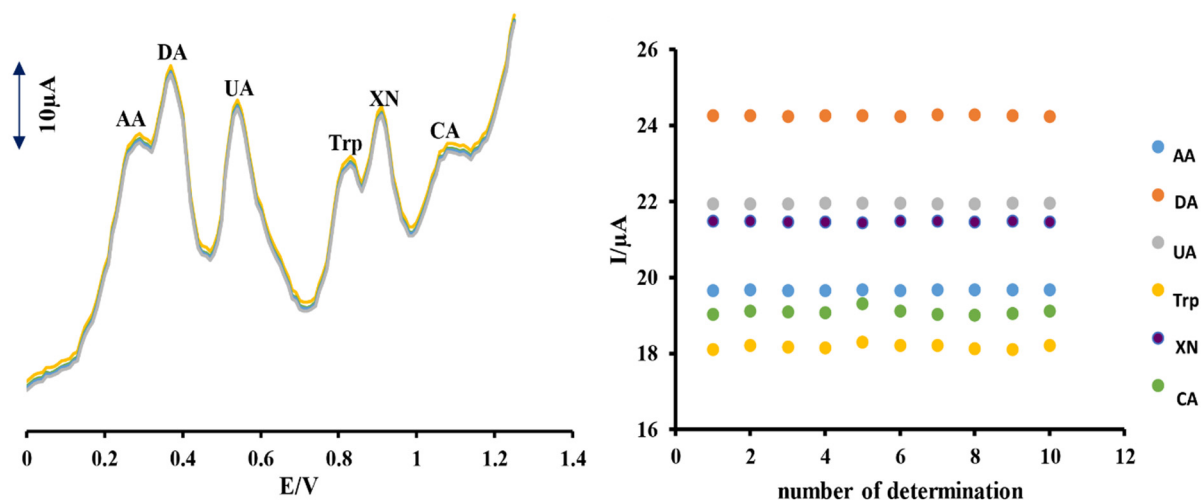

**Figure S3.** The stability of repeatability measurements of DPV using MGPE/MWCNTs-EA in 0.1 M PBS (pH 2.0) containing 14.9  $\mu M$  AA, 22.0  $\mu M$  DA, 14.9  $\mu M$  UA, 14.9  $\mu M$  Trp, 14.9  $\mu M$  XN and 22.0  $\mu M$  CA with the plot of  $\Delta I$  vs. number of consecutive measurements.

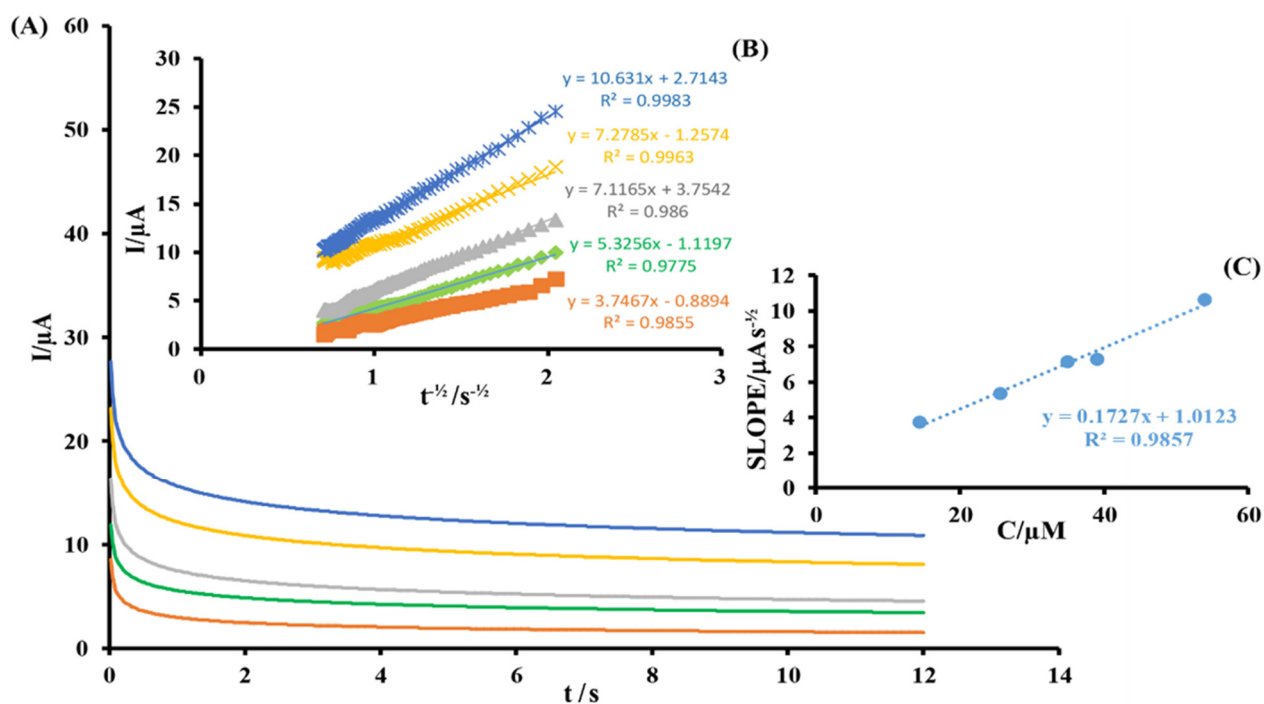

**Figure S4.** (A) Typical chronoamperograms obtained at MGPE/MWCNTs-EA in 0.1 M PBS (pH 2.0) for different concentrations of DA at 14.4  $\mu M$  (orange), 25.6  $\mu M$  (green), 35.0  $\mu M$  (gray), 39.0  $\mu M$  (yellow) and 54.0  $\mu M$  (blue); (B) Plots of  $I$  vs.  $t^{1/2}$  obtained from chronoamperograms; (C) Plot of the slope of the linear dynamic range against DA concentration.

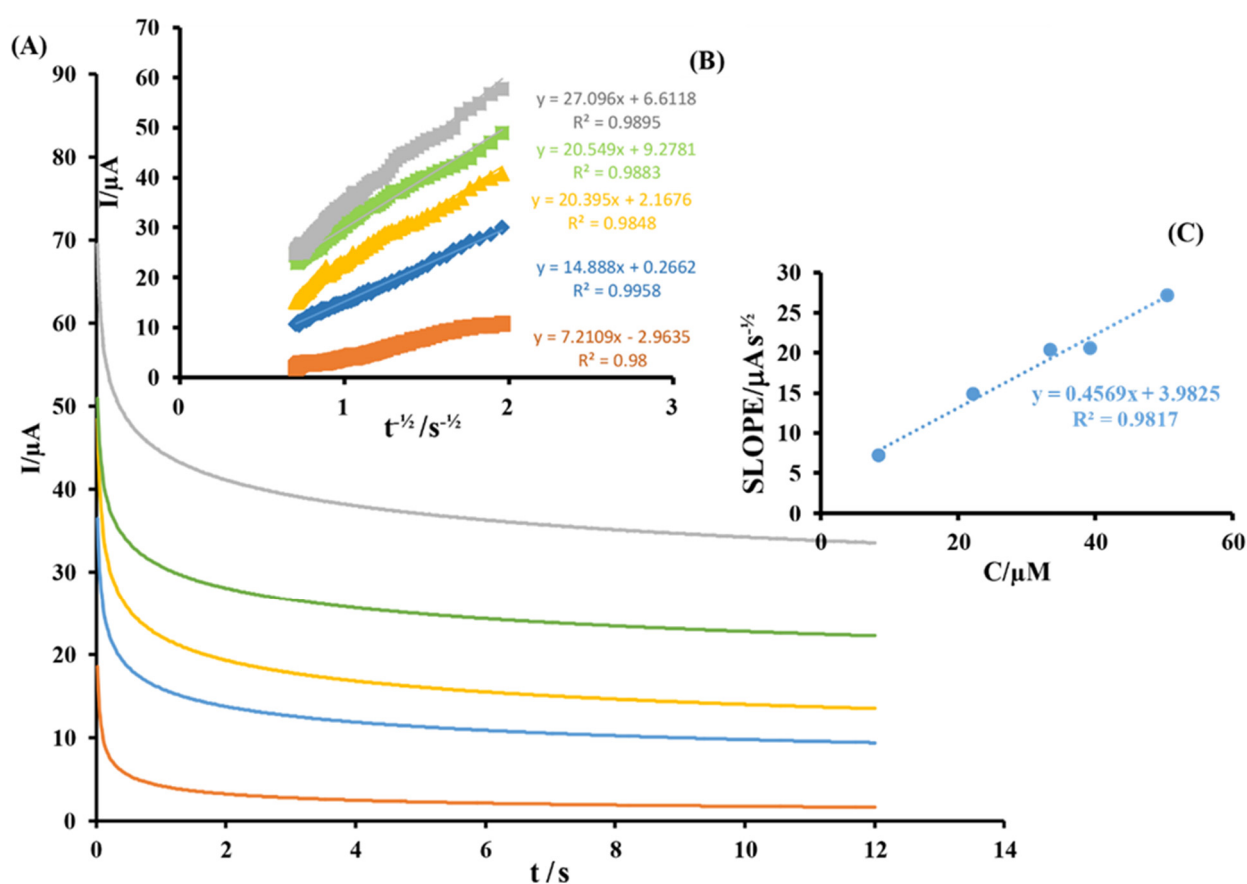

**Figure S5.** (A) Typical chronoamperograms obtained at MGPE/MWCNTs-EA in 0.1 M PBS (pH 2.0) for different concentration of UA at 8.4  $\mu\text{M}$  (orange), 22.2  $\mu\text{M}$  (blue), 33.4  $\mu\text{M}$  (yellow), 39.2  $\mu\text{M}$  (green) and 50.45  $\mu\text{M}$  (gray); (B) Plots of  $I$  vs.  $t^{-1/2}$  obtained from chronoamperograms; (C) Plot of the slope of the linear dynamic range against UA concentration.

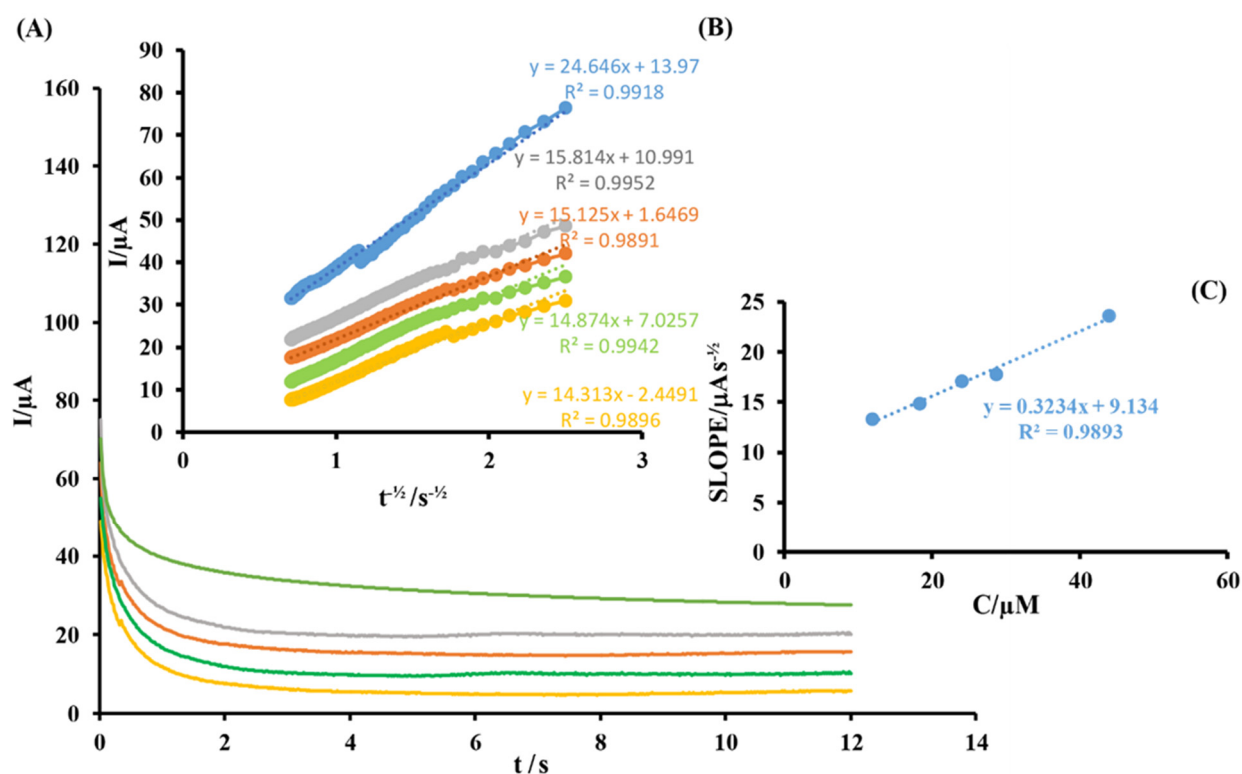

**Figure S6.** (A) Typical chronoamperograms obtained at MGPE/MWCNTs-EA in 0.1 M PBS (pH 2.0) for different concentration of Trp at 11.9  $\mu\text{M}$  (orange), 18.4  $\mu\text{M}$  (green), 24.0  $\mu\text{M}$  (red), 28.7  $\mu\text{M}$  (gray) and 43.9  $\mu\text{M}$  (blue); (B) Plots of  $I$  vs.  $t^{1/2}$  obtained from chronoamperograms; (C) Plot of the slope of the linear dynamic range against Trp concentration.

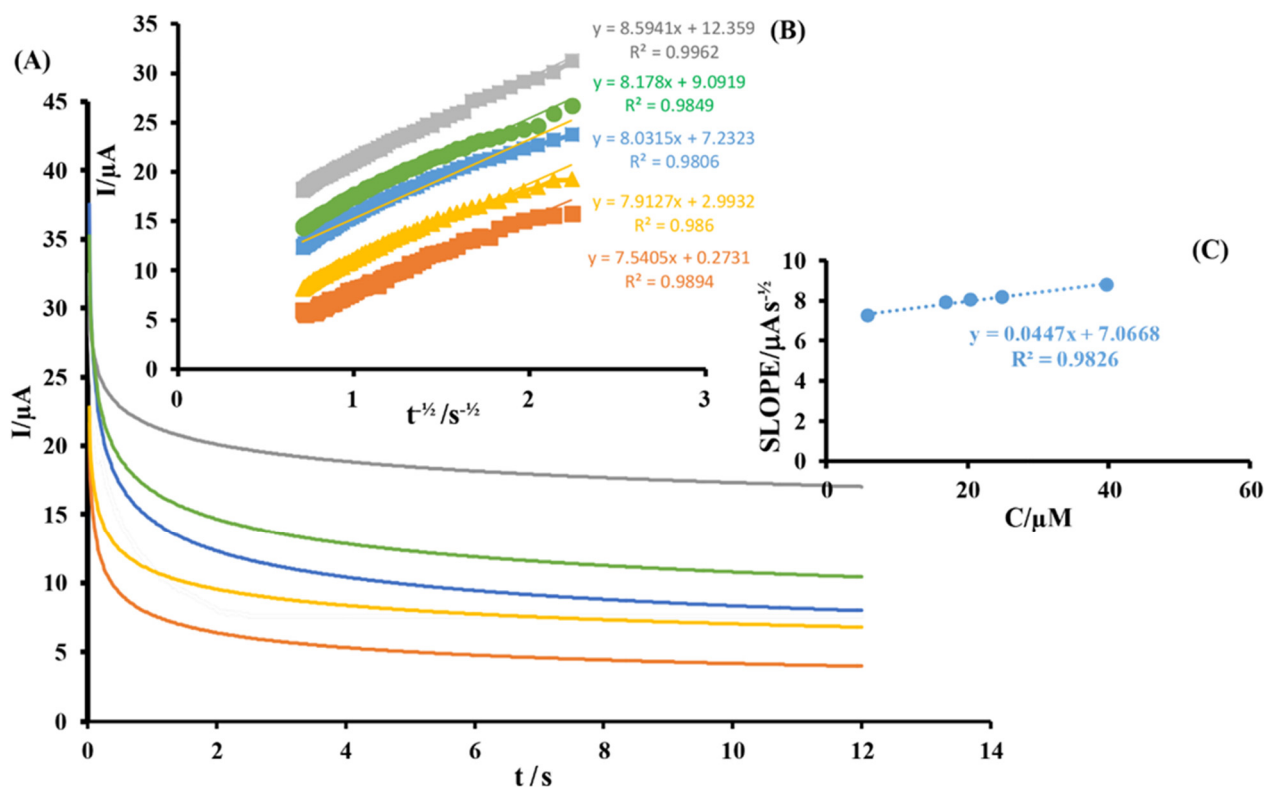

**Figure S7.** (A) Typical chronoamperograms obtained at MGPE/MWCNTs-EA in 0.1 M PBS (pH 2.0) for different concentration of XN at 5.9  $\mu\text{M}$  (orange), 16.9  $\mu\text{M}$  (yellow), 20.4  $\mu\text{M}$  (blue), 24.8  $\mu\text{M}$  (green) and 39.7  $\mu\text{M}$  (gray); (B) Plots of  $I$  vs.  $t^{1/2}$  obtained from chronoamperograms; (C) Plot of the slope of the linear dynamic range against XN concentration.

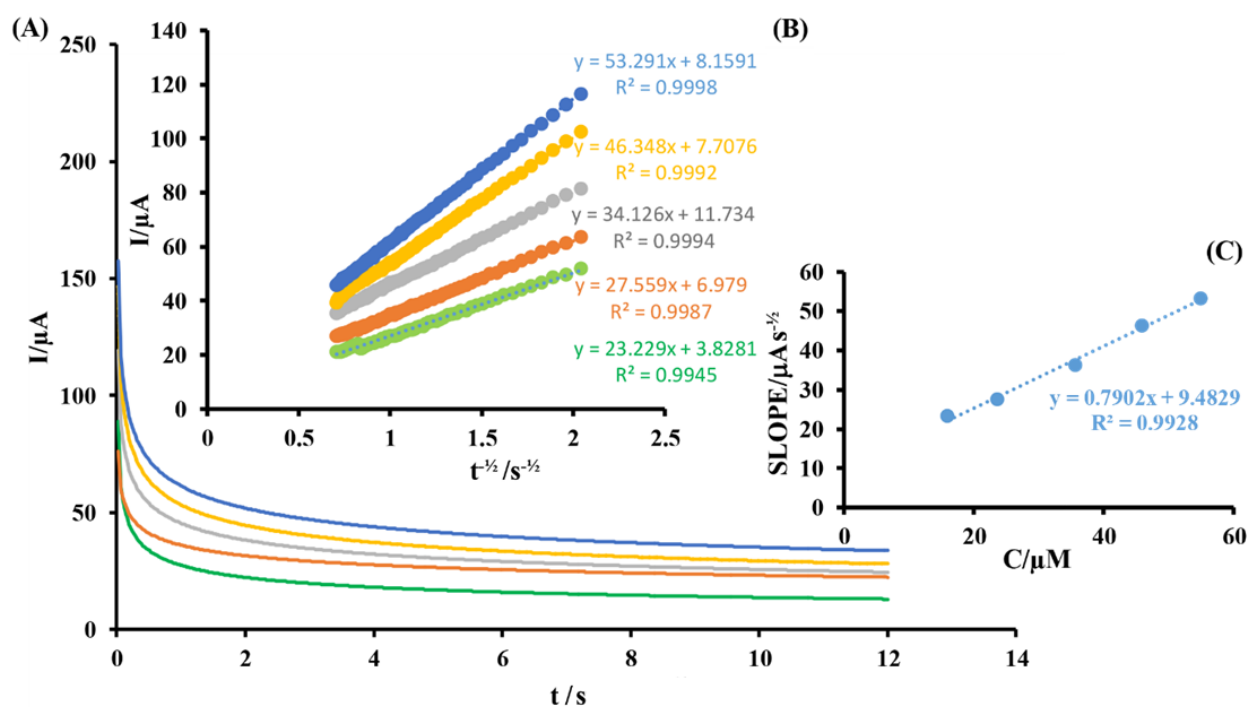

**Figure S8.** (A) Typical chronoamperograms obtained at MGPE/MWCNTs-EA in 0.1 M PBS (pH 2.0) for different concentrations of CA at 15.9  $\mu\text{M}$  (green), 23.6  $\mu\text{M}$  (orange), 35.6  $\mu\text{M}$  (gray), 45.8  $\mu\text{M}$  (yellow) and 54.9  $\mu\text{M}$  (blue); (B) Plots of  $I$  vs.  $t^{1/2}$  obtained from chronoamperograms; (C) Plot of the slope of the linear dynamic range against CA concentration.
