# Supplementary material for: Nanocomposite of Ellagic Acid with Multi-Walled Carbon Nanotubes for the Simultaneous Voltammetric Detection of Six Biomolecules
Source: MDPI journal article supplement (doi:10.3390/c7020043), 2021-05-03
Supplement: s1 [file s1]

Archive with 1 entries (1 files):
- carbon-1169238-SI.pdf
